# Supplementary material
Source: publisher site journal article supplement (https://www.dovepress.com/article/331860)
Supplement: Supplementary file 1 [file get_supplementary_file.php]

Supplemental file 1: Table showing the demographic and baseline data of all the patients recruited in the study.

|  | Zeiss AT LARA 829MP  (Mean ± SD) |
| --- | --- |
| Age (years) | 65.40±7.71 |
| Male: Females | 17:13 |
| K1 (D) | 43.31±2.19 |
| K2 (D) | 44.04±2.16 |
| Corneal astigmatism (D) | 0.73±0.37 |
| Axial length (mm) | 23.62±3.26 |
| IOL power (D) | 20.46±2.28 |
| ACD (mm) | 3.11±0.35 |
| CDVA (LogMAR) | 0.23±0.21 |

K= Keratometry, IOL power= Intraocular lens power, ACD: Anterior chamber depth, CDVA: Corrected Distance Visual Acuity, D= Dioptre
